# Supplementary material for: Understanding the Barriers and Attitudes toward Influenza Vaccine Uptake in the Adult General Population: A Rapid Review
Source: MDPI journal article supplement (doi:10.3390/vaccines11010180), 2023-01-13
Supplement: s1 [file s1]

## Supplementary material

### Search strategies

**Table S1. Embase search strategy**

| #  |                    | Searches                                                                                                                                                                                                                                                                                  | Results   |
|----|--------------------|-------------------------------------------------------------------------------------------------------------------------------------------------------------------------------------------------------------------------------------------------------------------------------------------|-----------|
| 1  | Disease terms      | exp *influenza vaccine/                                                                                                                                                                                                                                                                   | 19,034    |
| 2  |                    | exp *influenza/                                                                                                                                                                                                                                                                           | 49,024    |
| 3  |                    | exp *Influenza A virus/ or exp *Influenza B virus/                                                                                                                                                                                                                                        | 7,481     |
| 4  |                    | (flu or influenza).ti,ab.                                                                                                                                                                                                                                                                 | 125,478   |
| 5  |                    | or/1-4                                                                                                                                                                                                                                                                                    | 129,939   |
| 6  | Intervention terms | exp recombinant vaccine/ or exp live vaccine/ or exp virus vaccine/ or exp vaccine/ or exp subunit vaccine/ or exp DNA vaccine/ or exp acellular vaccine/ or exp virosome vaccine/ or exp inactivated vaccine/ or RNA vaccine/ or "mRNA vaccine".ti,ab.                                   | 340,195   |
| 7  |                    | exp immunization/                                                                                                                                                                                                                                                                         | 295,367   |
| 8  |                    | exp vaccination/                                                                                                                                                                                                                                                                          | 185,875   |
| 9  |                    | exp active immunization/                                                                                                                                                                                                                                                                  | 6,324     |
| 10 |                    | exp immunoprophylaxis/                                                                                                                                                                                                                                                                    | 4,667     |
| 11 |                    | exp mass immunization/                                                                                                                                                                                                                                                                    | 4,171     |
| 12 |                    | (vaccin* or immuni* or inocul*).ti,ab.                                                                                                                                                                                                                                                    | 764,131   |
| 13 |                    | or/6-12                                                                                                                                                                                                                                                                                   | 878,351   |
| 14 | Outcome terms      | (barrier* or uptake or refus* or decline*).ti,ab.                                                                                                                                                                                                                                         | 1,325,083 |
| 15 |                    | "patient attitude"/ or (patient\$ adj2 (attitude\$ or compliance or "non compliance" or adheren\$ or "non adherence" or participation or "non participation" or preference\$ or satisf\$ or dissatisf\$ or toleran\$ or intoleran\$ or "reported outcome" or "reported outcomes")).ti,ab. | 289,995   |
| 16 |                    | vaccine hesitancy/                                                                                                                                                                                                                                                                        | 2,837     |
| 17 |                    | hesitan*.ti,ab.                                                                                                                                                                                                                                                                           | 7,254     |
| 18 |                    | (preference* adj3 (valu* or measur* or health or life or estimat* or elicit* or disease or score* or instrument or instruments)).ti,ab.                                                                                                                                                   | 16,448    |
| 19 |                    | ("vaccin* acceptance" or "delayed vaccin* acceptance" or "altered vaccin* schedule").ti,ab.                                                                                                                                                                                               | 1,492     |
| 20 |                    | ((vaccin* or immuni* or inocul*) adj5 (belief* or doubt* or fear* or hesitanc* or trust or mistrust or delay or reject* or refus*)).ti,ab.                                                                                                                                                | 9,391     |
| 21 |                    | ((patient or physician) adj3 (accept* or willingness)).ti,ab.                                                                                                                                                                                                                             | 13,649    |
| 22 |                    | or/14-21                                                                                                                                                                                                                                                                                  | 1,618,838 |
| 23 | Study design terms | Clinical study/                                                                                                                                                                                                                                                                           | 109,621   |
| 24 |                    | exp case control study/                                                                                                                                                                                                                                                                   | 204,949   |
| 25 |                    | Family study/                                                                                                                                                                                                                                                                             | 24,969    |
| 26 |                    | Longitudinal study/                                                                                                                                                                                                                                                                       | 169,214   |
| 27 |                    | Retrospective study/                                                                                                                                                                                                                                                                      | 1,227,879 |

|    |       |                                                                                                                                                                                 |            |
|----|-------|---------------------------------------------------------------------------------------------------------------------------------------------------------------------------------|------------|
| 28 |       | Prospective study/                                                                                                                                                              | 756,324    |
| 29 |       | Cohort analysis/                                                                                                                                                                | 831,857    |
| 30 |       | (Cohort adj (study or studies)).mp.                                                                                                                                             | 396,336    |
| 31 |       | (Case control adj (study or studies)).tw.                                                                                                                                       | 151,338    |
| 32 |       | (follow up adj (study or studies)).tw.                                                                                                                                          | 61,725     |
| 33 |       | (observational adj (study or studies)).tw.                                                                                                                                      | 214,400    |
| 34 |       | (epidemiologic\$ adj (study or studies)).tw.                                                                                                                                    | 108,351    |
| 35 |       | (cross sectional adj (study or studies)).tw.                                                                                                                                    | 284,389    |
| 36 |       | exp observational study/                                                                                                                                                        | 269,991    |
| 37 |       | exp cross-sectional study/                                                                                                                                                      | 475,391    |
| 38 |       | exp medical record/                                                                                                                                                             | 279,087    |
| 39 |       | exp "administrative claims (health care)"/                                                                                                                                      | 1,000      |
| 40 |       | ((longitudinal* or retrospective* or prospective* or observ* or cohort or case control or cross sectional or follow up or pragmatic or claims or routine care) adj stud*).mp.   | 3,226,065  |
| 41 |       | (real world adj (data or stud* or effect* or evidence)).mp.                                                                                                                     | 25,817     |
| 42 |       | ((database or medical record*) adj3 (review or stud*)).mp.                                                                                                                      | 194,705    |
| 43 |       | ((semi structured or unstructured or structured) adj2 (interview* or survey* or focus group* or questionnaire*)).ti,ab.                                                         | 122,584    |
| 44 |       | exp Meta Analysis/ or ((meta adj analys*) or metaanalys*).ti,ab.                                                                                                                | 342,542    |
| 45 |       | "systematic review"/ or ("systematic literature review" or "SLR").ti,ab.                                                                                                        | 349,993    |
| 46 |       | or/23-45                                                                                                                                                                        | 4,432,944  |
| 47 |       | (exp Animal/ or nonhuman/) not exp human/                                                                                                                                       | 5,642,172  |
| 48 |       | exp case study/ or exp case report/ or exp letter/ or exp preliminary communication/ or exp note/ or exp editorial/ or exp editor/ or exp editorial policies/ or exp newspaper/ | 4,766,873  |
| 49 |       | or/47-48                                                                                                                                                                        | 10,267,934 |
| 50 |       | 46 not 49                                                                                                                                                                       | 4,105,493  |
| 51 | Total | 5 and 13 and 22 and 50                                                                                                                                                          | 2,210      |
| 52 |       | limit 51 to yr="2012 -Current"                                                                                                                                                  | 1,848      |

**Table S2. Medline search strategy**

| # |                    | Searches                  | Results |
|---|--------------------|---------------------------|---------|
| 1 | Disease terms      | exp Influenza, Human/     | 54,714  |
| 2 |                    | exp Influenza Vaccines/   | 25,450  |
| 3 |                    | exp Orthomyxoviridae/     | 61,817  |
| 4 |                    | (flu or influenza).ti,ab. | 116,270 |
| 5 |                    | or/1-4                    | 128,605 |
| 6 | Intervention terms | exp Vaccines, Synthetic/  | 30,996  |
| 7 |                    | exp Viral Vaccines/       | 130,757 |
| 8 |                    | exp Vaccines, Attenuated/ | 12,742  |

|    |                    |                                                                                                                                                                                                                                                                    |           |
|----|--------------------|--------------------------------------------------------------------------------------------------------------------------------------------------------------------------------------------------------------------------------------------------------------------|-----------|
| 9  |                    | exp Vaccines, Subunit/                                                                                                                                                                                                                                             | 6,162     |
| 10 |                    | exp Vaccines, DNA/                                                                                                                                                                                                                                                 | 10,515    |
| 11 |                    | exp Vaccines, Acellular/                                                                                                                                                                                                                                           | 1,678     |
| 12 |                    | exp Vaccines, Virosome/                                                                                                                                                                                                                                            | 224       |
| 13 |                    | exp Vaccines, Inactivated/                                                                                                                                                                                                                                         | 9,022     |
| 14 |                    | exp mRNA Vaccines/                                                                                                                                                                                                                                                 | 2,059     |
| 15 |                    | exp Immunization/                                                                                                                                                                                                                                                  | 196,620   |
| 16 |                    | exp Mass Vaccination/ or exp Anti-Vaccination Movement/ or exp Vaccination/                                                                                                                                                                                        | 99,408    |
| 17 |                    | exp Vaccination Hesitancy/ or exp Vaccination Coverage/ or exp Vaccination Refusal/                                                                                                                                                                                | 3,127     |
| 18 |                    | exp Immunization/ or exp Immunization Programs/                                                                                                                                                                                                                    | 202,861   |
| 19 |                    | (vaccin* or immuni* or inocul*).ti,ab.                                                                                                                                                                                                                             | 738,256   |
| 20 |                    | or/6-19                                                                                                                                                                                                                                                            | 810,753   |
| 21 | Outcome terms      | (barrier* or uptake or refus* or decline*).ti,ab.                                                                                                                                                                                                                  | 1,119,805 |
| 22 |                    | (patient\$ adj2 (attitude\$ or compliance or "non compliance" or adheren\$ or "non adherence" or participation or "non participation" or preference\$ or satisf\$ or dissatisf\$ or toleran\$ or intoleran\$ or "reported outcome" or "reported outcomes")).ti,ab. | 146,665   |
| 23 |                    | (hesitan* or "vaccin* acceptance" or "delayed vaccin* acceptance" or "altered vaccin* schedule").ti,ab.                                                                                                                                                            | 6,813     |
| 24 |                    | (preference* adj3 (valu* or measur* or health or life or estimat* or elicit* or disease or score* or instrument or instruments)).ti,ab.                                                                                                                            | 12,868    |
| 25 |                    | ((vaccin* or immuni* or inocul*) adj5 (belief* or doubt* or fear* or hesitanc* or trust or mistrust or delay or reject* or refus*)).ti,ab.                                                                                                                         | 8,329     |
| 26 |                    | ((patient or physician) adj3 (accept* or willingness)).ti,ab.                                                                                                                                                                                                      | 9,681     |
| 27 |                    | or/21-26                                                                                                                                                                                                                                                           | 1,281,156 |
| 28 | Study design terms | Clinical Study/                                                                                                                                                                                                                                                    | 4,710     |
| 29 |                    | Case-Control Studies/                                                                                                                                                                                                                                              | 320,643   |
| 30 |                    | Longitudinal Studies/                                                                                                                                                                                                                                              | 157,536   |
| 31 |                    | Retrospective Studies/                                                                                                                                                                                                                                             | 1,021,428 |
| 32 |                    | Prospective Studies/                                                                                                                                                                                                                                               | 625,406   |
| 33 |                    | Cohort Studies/                                                                                                                                                                                                                                                    | 311,668   |
| 34 |                    | ((Cohort or "case control" or "follow up" or observational or "cross sectional") adj (study or studies)).mp.                                                                                                                                                       | 2,034,036 |
| 35 |                    | Observational Study/                                                                                                                                                                                                                                               | 126,159   |
| 36 |                    | Cross-Sectional Studies/                                                                                                                                                                                                                                           | 423,044   |
| 37 |                    | ((longitudinal* or retrospective* or prospective* or observ* or cohort or case control or cross sectional or follow up or pragmatic or claims or routine care) adj stud*).mp.                                                                                      | 3,303,799 |
| 38 |                    | (real world adj (data or stud* or effect* or evidence)).mp.                                                                                                                                                                                                        | 12,738    |
| 39 |                    | Medical Records/                                                                                                                                                                                                                                                   | 66,103    |
| 40 |                    | ((database or medical record*) adj3 (review or stud*)).mp.                                                                                                                                                                                                         | 32,620    |
| 41 |                    | ((semi structured or unstructured or structured) adj2 (interview* or survey* or focus group* or questionnaire*)).ti,ab.                                                                                                                                            | 93,474    |

|    |       |                                                                                                                                                                                 |           |
|----|-------|---------------------------------------------------------------------------------------------------------------------------------------------------------------------------------|-----------|
| 42 |       | exp Meta Analysis/ or ((meta adj analys*) or metaanalys*).ti,ab. or "systematic review"/ or ("systematic literature review" or "SLR").ti,ab.                                    | 352,607   |
| 43 |       | or/28-42                                                                                                                                                                        | 3,723,489 |
| 44 |       | (exp Animal/ or nonhuman/) not exp human/                                                                                                                                       | 4,998,985 |
| 45 |       | exp case study/ or exp case report/ or exp letter/ or exp preliminary communication/ or exp note/ or exp editorial/ or exp editor/ or exp editorial policies/ or exp newspaper/ | 3,825,013 |
| 46 |       | 5 and 20 and 27 and 43                                                                                                                                                          | 1,661     |
| 47 |       | 46 not (or/44-45)                                                                                                                                                               | 1,655     |
| 48 | Total | limit 47 to yr="2015 -Current"                                                                                                                                                  | 1,060     |

## Study quality appraisal checklist

**Table S3. Quality appraisal checklist**

| Study name<br>Study question                                                                 | Response<br>(Yes/No/N/A) |
|----------------------------------------------------------------------------------------------|--------------------------|
| Was the sample frame appropriate to address the target population?                           |                          |
| Were study participants sampled in an appropriate way?                                       |                          |
| Was the sample size adequate?                                                                |                          |
| Were the study subjects and the setting described in detail?                                 |                          |
| Was the data analysis conducted with sufficient coverage of the identified sample?           |                          |
| Were valid methods used for the confirmation of vaccination?                                 |                          |
| Was vaccination confirmation measured in a standard, reliable way for all participants?      |                          |
| Was there appropriate statistical analysis?                                                  |                          |
| Was the response rate adequate, and if not, was the low response rate managed appropriately? |                          |

Adapted from “JBI Manual for Evidence Synthesis”[12]

JBI: Joanna-Briggs Institute, N/A: Not Applicable.

**Table S4. JBI quality appraisal of included studies**

[illegible]



[illegible]





[illegible]
